# Supplementary material for: A tetrameric hetero-octanuclear cyclic helicate formed from a bridging ligand with two inequivalent binding sites
Source: Royal Society of Chemistry journal article supplement (doi:10.1039/c3ra42598c), 2013-01-01
Supplement: c3ra42598c.pdf [file c3ra42598c.pdf]

## A tetrameric hetero-octanuclear cyclic helicate formed from a bridging ligand with two inequivalent binding sites

Alexander J. Metherell and Michael D. Ward

*Supporting Information – details of ligand synthesis and <sup>1</sup>H NMR spectrum of H<sub>2</sub>L*

3-(2-pyridyl)pyrazole prepared as published earlier.<sup>S1</sup>

### Synthesis of 1

A mixture of 3-(hydroxymethyl)aniline (7.50 g, 60.90 mmol) and di-*tert*-butyl dicarbonate (13.50 g, 61.86 mmol) was stirred in THF (150 cm<sup>3</sup>) at 25°C for 48 h. The resultant brown solution was reduced to dryness before purification of the crude brown oil by silica column. Elution with ethyl acetate/ 40:60 petroleum ether (1:2) followed by sonication for 10 minutes in hexane yielded **1** as a white solid (Yield: 13.01 g, 58.27 mmol, 96 %). <sup>1</sup>H-NMR (400 MHz, CDCl<sub>3</sub>): δ 7.48 (1H, s; ArH), 7.32 – 7.23 (2H, m; ArH), 7.08 – 7.06 (1H, m; ArH), 6.52 (1H, bs; NH), 4.69 (2H, d; CH<sub>2</sub>), 1.75 (1H, t; OH), 1.54 (9H, s; <sup>t</sup>Bu). ESMS: *m/z* 262 [M + K]<sup>+</sup>, 246 [M + Na]<sup>+</sup>, 150 [M – O<sup>t</sup>Bu]<sup>+</sup>; Found: C, 64.60; H, 7.67; N, 6.17 %. Required for C<sub>12</sub>H<sub>17</sub>NO<sub>3</sub>: C, 64.55; H, 7.67; N, 6.27 %. Data is in accordance with the literature.<sup>S2</sup>

### Synthesis of 2

A solution of **1** (3.22 g, 14.42 mmol) in CH<sub>2</sub>Cl<sub>2</sub> (70 cm<sup>3</sup>) was maintained at 0°C with stirring. To this was added PPh<sub>3</sub> (6.10 g, 23.26 mmol) and CBr<sub>4</sub> (7.94 g, 23.94 mmol) sequentially, and the resultant yellow solution was stirred at 0°C for 1.5 h. The reaction mixture was then diluted with EtOAc and stirred for a further 0.5 h, before washing with brine. The organic layer was extracted with EtOAc, dried over MgSO<sub>4</sub> and concentrated before purification by silica column. Elution with ethyl acetate/ 40:60 petroleum ether (1:12) yielded **2** as a white solid (Yield: 2.95 g, 10.31 mmol, 67 %). <sup>1</sup>H-NMR (400 MHz, CDCl<sub>3</sub>): δ 7.54 (1H, s; ArH), 7.31 – 7.21 (2H, m; ArH), 7.10 – 7.07 (1H, m; ArH), 6.52 (1H, bs; NH), 4.48 (2H, s; CH<sub>2</sub>), 1.75 (1H, t; OH), 1.55 (9H, s; <sup>t</sup>Bu). ESMS *m/z* 286 [M + H]<sup>+</sup>, 288 [M + H]<sup>+</sup>. Found: C, 50.53; H, 5.42; N, 4.77 %. Required for C<sub>12</sub>H<sub>16</sub>BrNO<sub>2</sub>, 50.37; H, 5.64; N, 4.89 %. Data is in accordance with the literature.<sup>S2</sup>

### Synthesis of 3

A mixture of **2** (2.95 g, 10.29 mmol), 3-(2-pyridyl)pyrazole (1.50 g, 10.33 mmol), THF (120 cm<sup>3</sup>) and aqueous NaOH (13 M, 7.5 cm<sup>3</sup>) was stirred at 75°C for 24 h. The organic layer was separated, dried over MgSO<sub>4</sub> and concentrated before purification by silica column. Elution with EtOAc/ DCM (4:1) yielded **3** as a white solid (Yield: 2.55 g, 71 %). <sup>1</sup>H-NMR (400 MHz, CDCl<sub>3</sub>): δ 8.65 (1H, ddd; pyridyl H<sup>6</sup>), 7.97 (1H, dt; pyridyl H<sup>3</sup>), 7.73 (1H, td; pyridyl H<sup>4</sup>), 7.43 (1H, d; pyrazolyl H<sup>5</sup>), 7.34 – 7.25 (3H, m; ArH), 7.21 (1H, ddd; pyridyl H<sup>5</sup>), 6.94 – 6.92 (2H, m; Ar-H and pyrazolyl H<sup>4</sup>), 6.55 (1H, bs; NH), 5.38 (2H, s; CH<sub>2</sub>), 1.52 (9H, s; <sup>t</sup>Bu). ESMS: *m/z* 373 [M + Na]<sup>+</sup>, 351 [M + H]<sup>+</sup>. Found: C, 68.46; H, 6.35; N, 15.78 %. Required for C<sub>20</sub>H<sub>22</sub>N<sub>4</sub>O<sub>2</sub>: C, 68.55; H, 6.33; N, 15.99 %.

### Synthesis of 4

To a solution of **3** (1.51 g, 4.31 mmol) in CH<sub>2</sub>Cl<sub>2</sub> (20 cm<sup>3</sup>) was added 1,1,1-trifluoroacetic acid (20 cm<sup>3</sup>) and the resultant yellow mixture was stirred at 25°C for 14 h. The solvent was removed *in vacuo* and the clear brown oil was repeatedly washed with CH<sub>2</sub>Cl<sub>2</sub>/MeOH (1:1) and evaporated to dryness in order to remove all traces of TFA. The cream-coloured solid was washed with aqueous K<sub>2</sub>CO<sub>3</sub> and the organic layer extracted with DCM, dried over MgSO<sub>4</sub> and evaporated to dryness, yielding **4** as a white solid (Yield: 0.81 g, 75 %). <sup>1</sup>H-NMR (400 MHz, CDCl<sub>3</sub>): δ 8.65 (1H, ddd; pyridyl H<sup>6</sup>), 7.97 (1H, dt; pyridyl H<sup>3</sup>), 7.72 (1H, td; pyridyl H<sup>4</sup>), 7.42 (1H, d; pyrazolyl H<sup>5</sup>), 7.20 (1H, ddd; pyridyl H<sup>5</sup>), 7.14 (1H, t; Ar-H), 6.92 (1H, d; pyrazolyl H<sup>4</sup>), 6.68 – 6.61 (2H, m; Ar-H), 6.53 (1H, t; Ar-H), 5.31 (2H, s; CH<sub>2</sub>), 3.56 (2H, bs; NH<sub>2</sub>). ESMS: *m/z* 251 [M + H]<sup>+</sup>. Found: C, 70.70; H, 5.46; N, 21.64 %. Required for C<sub>15</sub>H<sub>14</sub>N<sub>4</sub>: C, 71.98; H, 5.64; N, 22.38 %.

### Synthesis of 5

2,3-dimethoxybenzoic acid (4.70 g, 25.8 mmol), SOCl<sub>2</sub> (7 cm<sup>3</sup>, 96.5 mmol) and a drop of DMF were heated to reflux with stirring for 6 h. The condenser was fitted with a CaCl<sub>2</sub> drying tube to absorb liberated SO<sub>2</sub> and HCl. The resultant clear yellow solution was diluted with CHCl<sub>3</sub> and reduced to dryness three times. Drying under high vacuum yielded **5** as an off white solid, which was used without any further purification, assuming quantitative yield (Yield: 5.10 g, 99 %). <sup>1</sup>H-NMR (250 MHz, CDCl<sub>3</sub>): δ 7.55 (1H,

dd; Ar-H), 7.20-7.15 (2H, m; Ar-H), 3.94 (3H, s; OMe), 3.92 (3H, s; OMe). EIMS  $m/z$  224  $[M + Na]^+$ , 165  $[M - Cl]^+$ . Data is in accordance with the literature.<sup>S3</sup>

### Synthesis of **6**

A mixture of **4** (0.51 g, 2.0 mmol) and **5** (0.44 g, 2.2 mmol) were stirred in dry  $CH_2Cl_2$  (25  $cm^3$ ) under nitrogen flow. To the cloudy solution was added  $Et_3N$  (0.55  $cm^3$ , 4.0 mmol), and the resultant clear solution was stirred at room temperature for 1 h. The mixture was then sequentially washed with 1M HCl (50  $cm^3$ ) and 1M NaOH (50  $cm^3$ ). The organic layer was extracted with DCM, dried over  $MgSO_4$  and concentrated before purification by silica column. Elution with  $EtOAc/CH_2Cl_2$  (1:1) yielded **6** as a clear yellow oil (Yield: 0.80 g, 97%).  $^1H$ -NMR (400 MHz,  $CDCl_3$ ):  $\delta$  10.05 (1H, s; NH), 8.62 (1H, ddd; pyridyl H<sup>6</sup>), 7.95 (1H, dt; pyridyl H<sup>3</sup>), 7.75 (1H, dd; Ph-H), 7.72 – 7.66 (2H, m; Ph-H and pyridyl H<sup>4</sup>), 7.58 (1H, dd; cat-H), 7.46 (1H, d; pyrazolyl H<sup>5</sup>), 7.33 (1H, t; cat-H), 7.22 – 7.13 (2H, m; Ph-H and pyridyl H<sup>5</sup>), 7.07 (1H, dd; Ph-H), 7.00 (1H, dd; cat-H), 6.92 (1H, d; pyrazolyl H<sup>4</sup>), 5.40 (2H, s;  $CH_2$ ), 3.95 (3H, s; OMe); 3.89 (3H, s; OMe). ESMS:  $m/z$  415  $[M + H]^+$ . Found: C, 60.67; H, 4.51; N, 11.52 %. Required for  $C_{24}H_{22}N_4O_3$ : DCM: C, 60.13; H, 4.84; N, 11.22 %.

### Synthesis of **H<sub>2</sub>L**

$BBr_3$  (1M solution in  $CH_2Cl_2$ , 17  $cm^3$ , 17 mmol) was added dropwise to a solution of **6** (0.80 g, 1.9 mmol) in dry DCM (50  $cm^3$ ) maintained at  $-78^\circ C$  and then stirred at room temperature overnight. The reaction mixture was quenched with MeOH and the volatiles were removed under reduced pressure. The resultant black residue was suspended in  $H_2O$  at  $100^\circ C$  for 2 h and the brown solution was cooled and filtered. The pink precipitate was washed with water and DCM, and the resultant white solid was recrystallized from MeOH, yielding a white solid (Yield: 0.61 g, 83%).  $^1H$ -NMR (400 MHz,  $(CD_3)_2SO$ ):  $\delta$  11.51 (1H, bs; Ar-OH), 10.39 (1H, s; NH), 8.69 (1H, ddd; pyridyl H<sup>6</sup>), 8.41 – 8.25 (2H, m; Ar-H and pyridyl H<sup>3</sup>), 8.16 (1H, d; pyrazolyl H<sup>5</sup>), 7.78 – 7.68 (2H, m; Ar-H), 7.61 (1H, dd; Ar-H), 7.44 – 7.33 (2H, m; Ar-H and pyridyl H<sup>5</sup>), 7.20 (1H, d; pyrazolyl H<sup>4</sup>), 7.09 (1H, dt; Ar-H), 6.98 (1H, dd; Ar-H), 6.76 (1H, t; Ar-H), 5.53 (2H, s;  $CH_2$ ). ESMS:  $m/z$  387  $[M + H]^+$ . Found: C, 56.50 ; H, 4.04; N, 11.81 %. Required for  $C_{22}H_{18}N_4O_3 \cdot HBr$ : C, 56.54; H, 4.10; N, 11.99 %.

- S1. A. J. Amoroso, A. M. C. Thompson, J. C. Jeffery, P. L. Jones, J. A. McCleverty and M. D. Ward, *J. Chem. Soc., Chem. Comm.*, 1994, 2751.
- S2. F. J. Brown, P. R. Bernstein, L. A. Cronk, D. L. Dosset, K. C. Hebbel, T. P. Maduskuie, H. S. Shapiro, E. P. Vacek, Y. K. Yee, A. K. Willard, R. D. Krell and D. W. Snyder, *J. Med. Chem.*, 1989, **32**, 807.
- S3. M. Meyer, B. Kersting, R. E. Powers and K. N. Raymond, *Inorg. Chem.*, 1997, **36**, 5179.

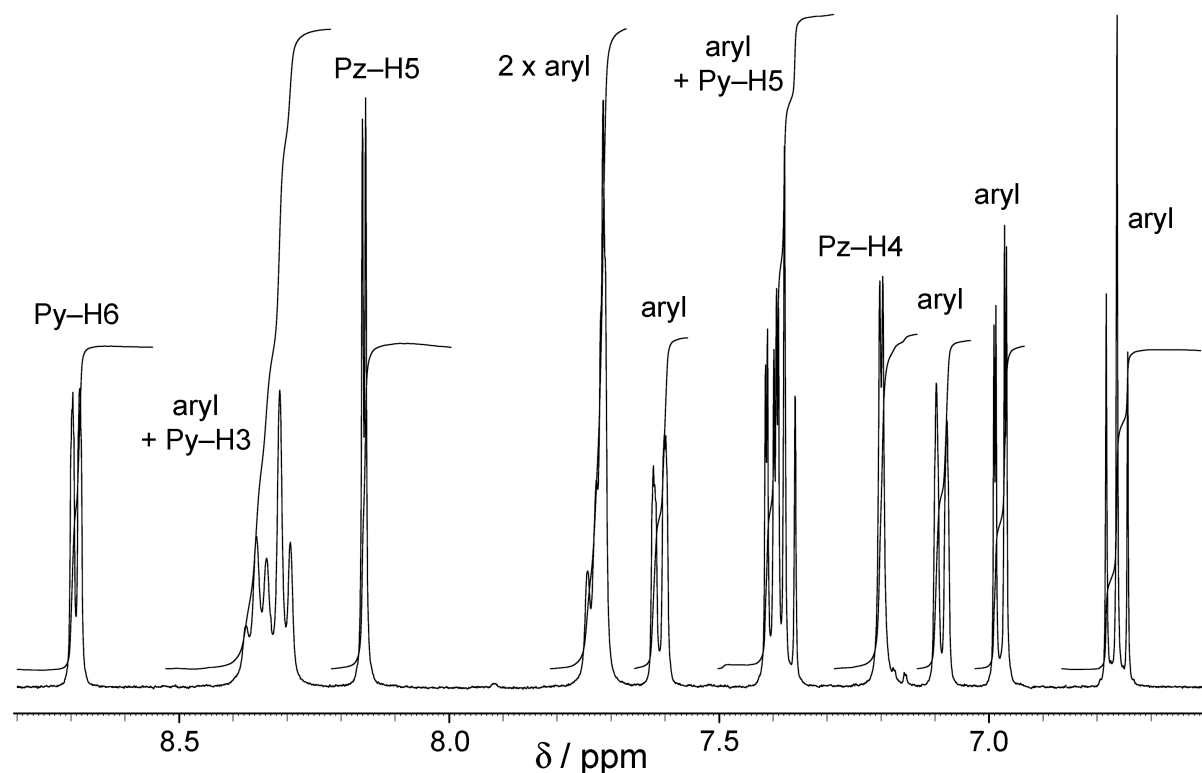

Fig. S1. Part of the  $^1\text{H}$  NMR spectrum of  $\text{H}_2\text{L}$  in  $\text{d}_6\text{-DMSO}$  (py = pyridyl; pz = pyrazolyl). Not shown are the NH and OH protons at  $> 10$  ppm and the methylene protons at 5.53 ppm.
